# Supplementary material for: Comparative and Evolutionary Analyses of Meloidogyne spp. Based on Mitochondrial Genome Sequences
Source: PubMed Central journal article supplement (PMC4370701; doi:10.1371/journal.pone.0121142), 2015-03-23

**S1 Figure. Maximum Likelihood phylogenetic tree based on nucleotide sequences of eight mitochondrial protein-coding genes (4,920 bp).** Numbers above branches represent bootstrap support values >50%. The mtDNA gene arrangement (GA) according to Liu *et al.* [8] is shown next to each species name.

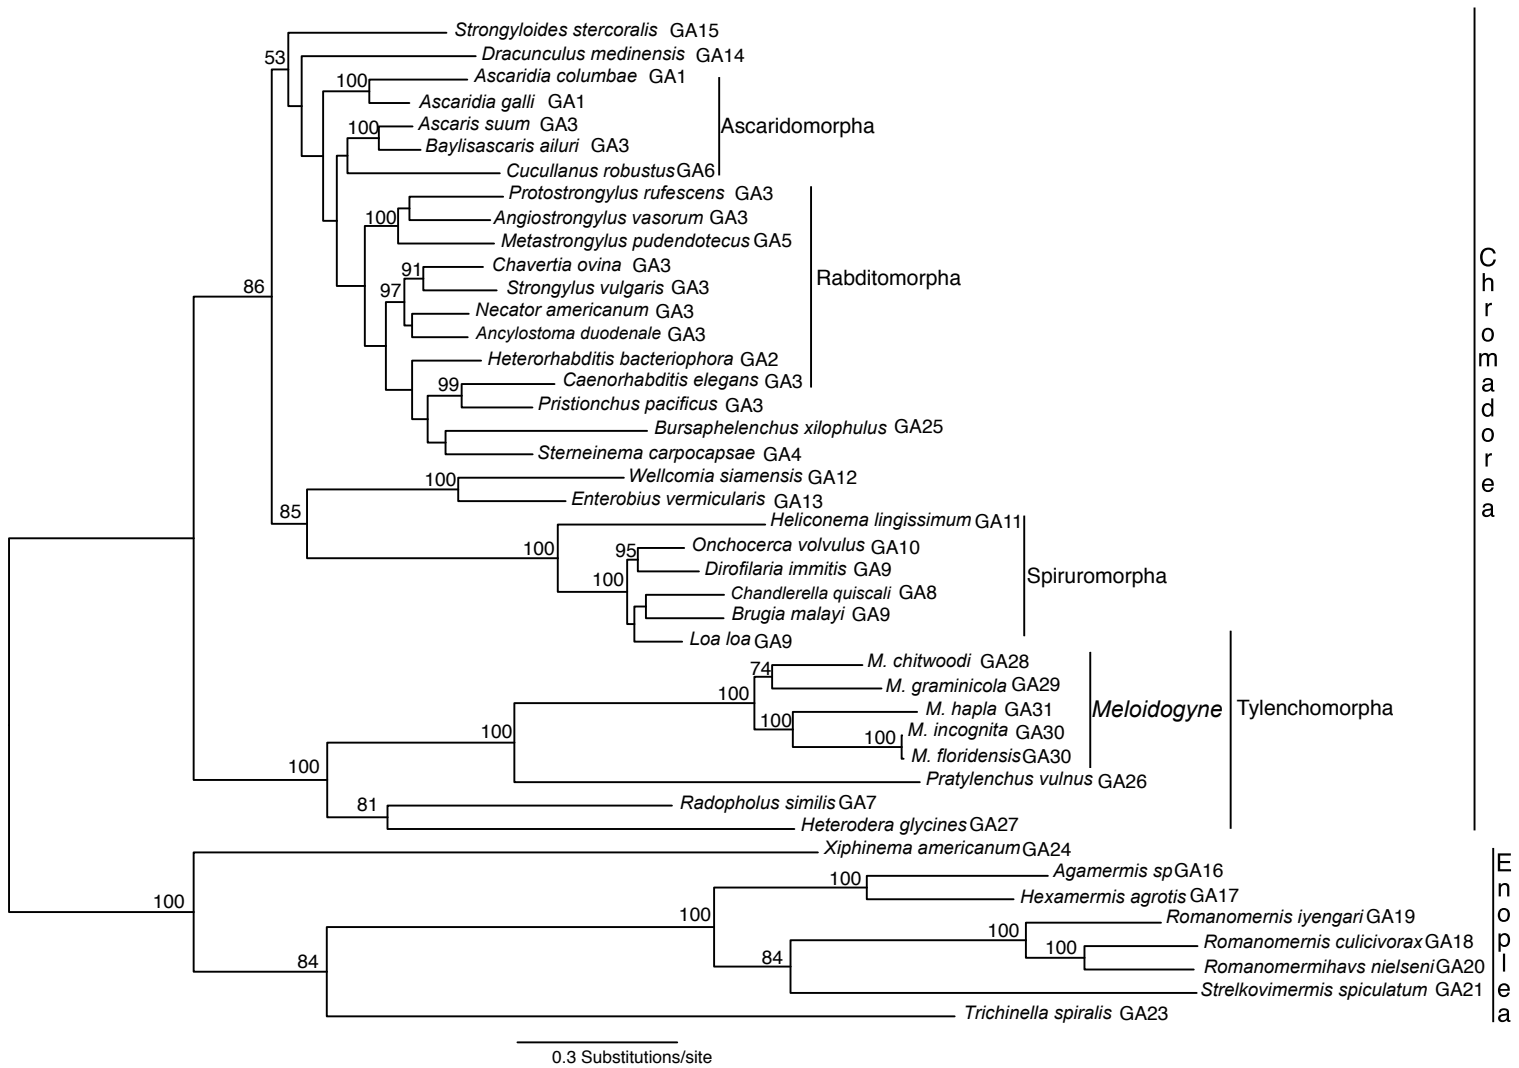

Supplement: pone.0121142.s001.pdf [file pone.0121142.s001.pdf]
