# Supplementary material for: Comparative and Evolutionary Analyses of Meloidogyne spp. Based on Mitochondrial Genome Sequences
Source: PubMed Central journal article supplement (PMC4370701; doi:10.1371/journal.pone.0121142), 2015-03-23
Supplement: pone.0121142.s003.pdf [file pone.0121142.s003.pdf]

**S3 Figure. Maximum Likelihood (ML) phylogenetic tree of *Meloidogyne* spp. based on the *cox2-rrnS* mitochondrial region. Numbers above branches represent ML bootstrap values >50%. Species names in red, green or black indicate species with mitotic parthenogenesis, meiotic parthenogenesis or unknown reproductive strategy, respectively.**

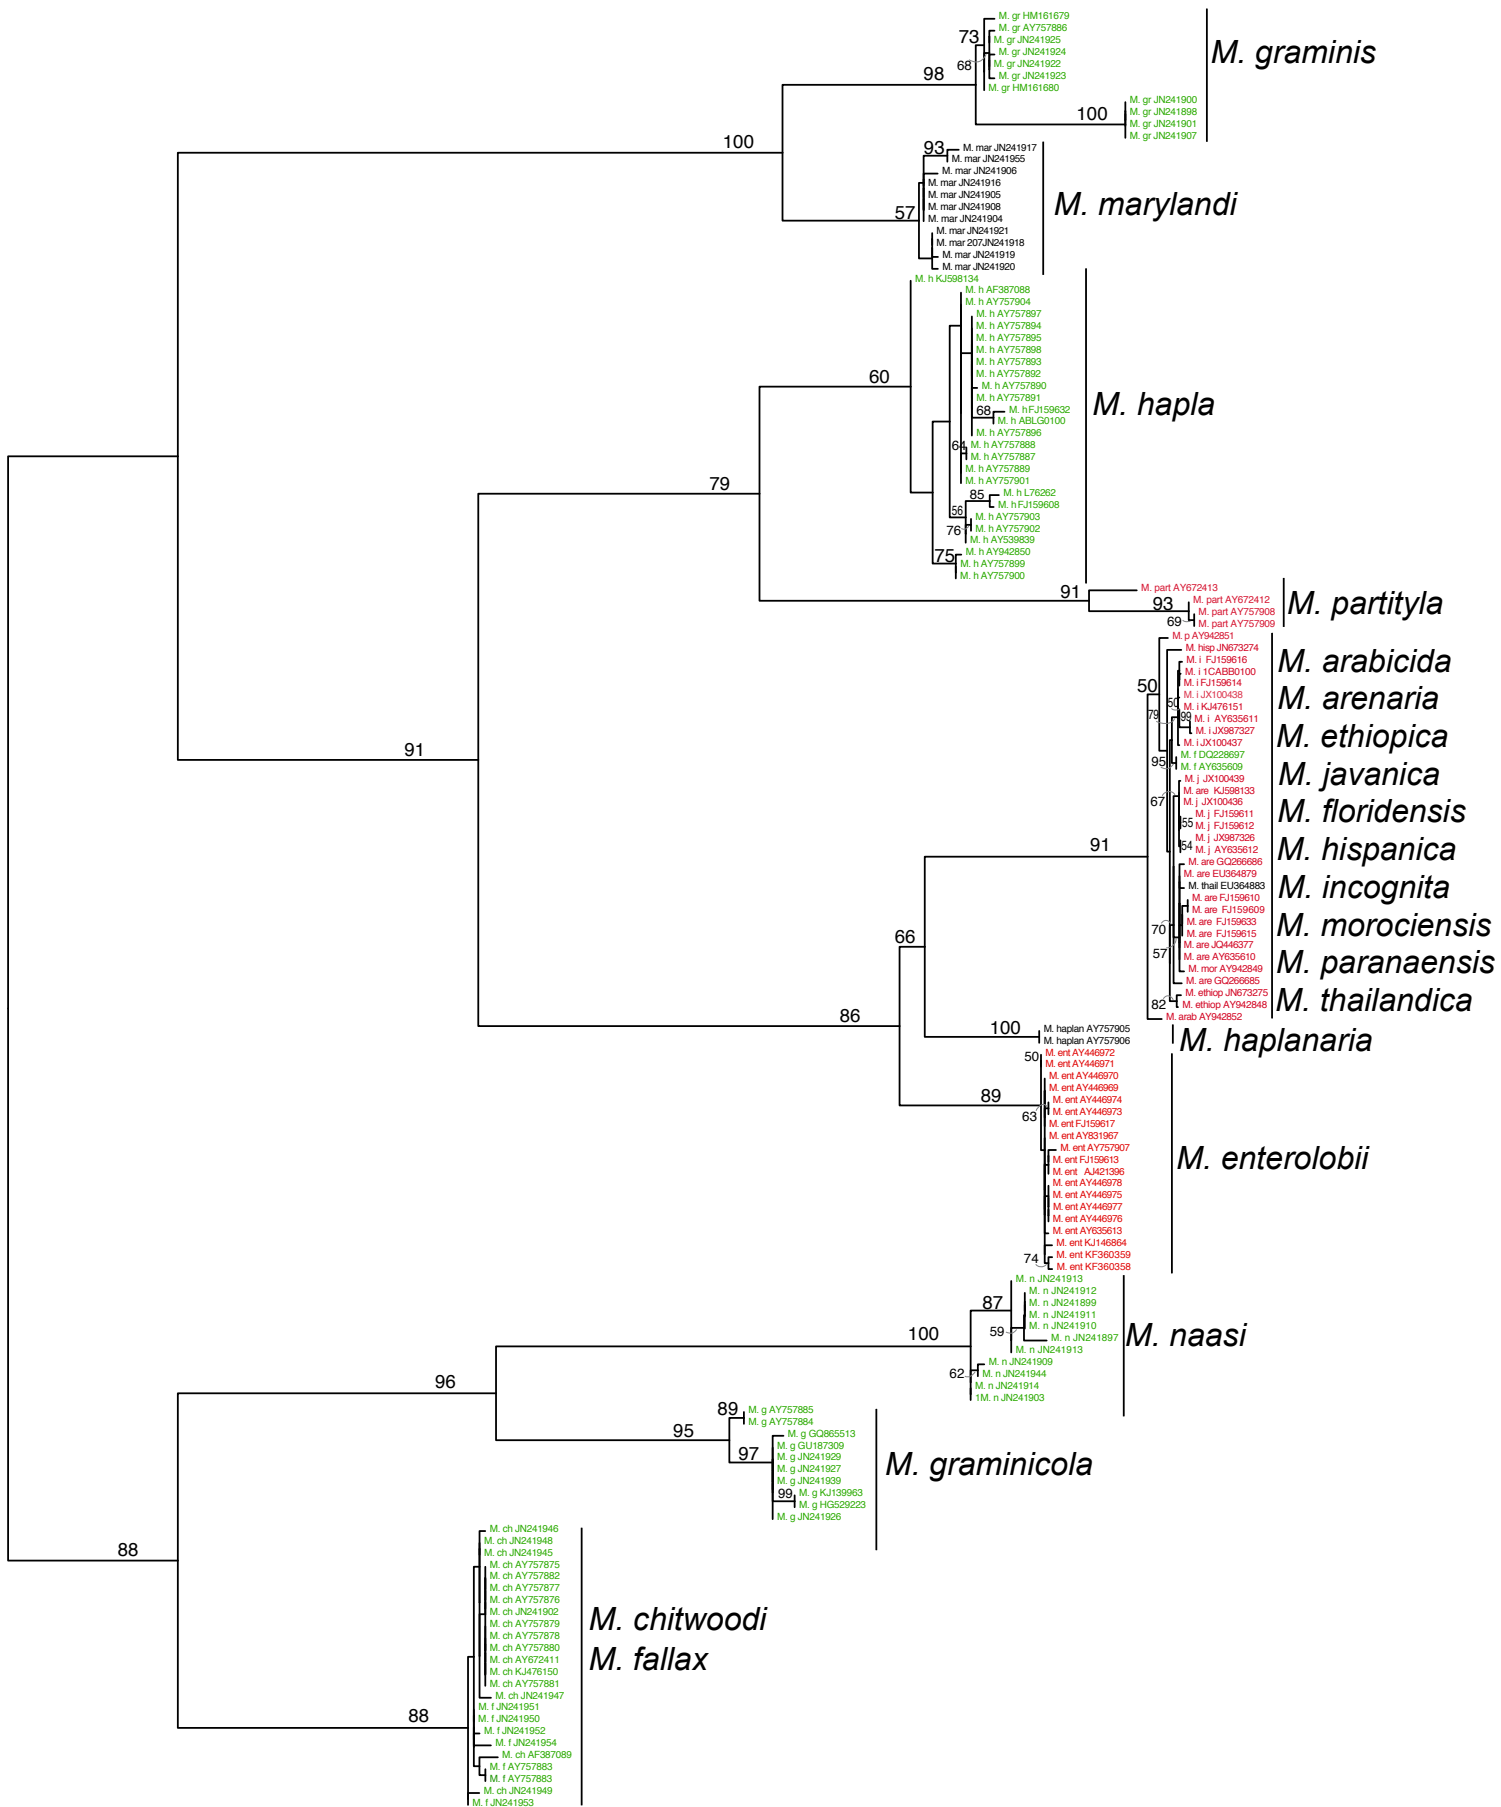

0.1 substitutions/site
