# Supplementary material for: Comparative and Evolutionary Analyses of Meloidogyne spp. Based on Mitochondrial Genome Sequences
Source: PubMed Central journal article supplement (PMC4370701; doi:10.1371/journal.pone.0121142), 2015-03-23
Supplement: pone.0121142.s004.pdf [file pone.0121142.s004.pdf]

S1 Table. GenBank accession numbers of *Meloidogyne* spp. with similarity to mitochondrial DNA.

| <i>M. floridensis</i> | <i>M. hapla</i>    | <i>M. incognita</i> |
|-----------------------|--------------------|---------------------|
| CCDZ01004464 (WGS)    | ABLG01002664 (WGS) | CABB01003114 (WGS)  |
| CCDZ01045455 (WGS)    | BM902142 (EST)     | CABB01002405 (WGS)  |
| CCDZ01055118 (WGS)    | ABLG01002088 (WGS) | CABB01006285 (WGS)  |
| CCDZ01019919 (WGS)    | BM884076 (EST)     |                     |
| CCDZ01014978 (WGS)    | ABLG01003195( WGS) |                     |
| CCDZ01030454 (WGS)    |                    |                     |
| CCDZ01023550 (WGS)    |                    |                     |
| CCDZ01013075 (WGS)    |                    |                     |
| CCDZ01049469 (WGS)    |                    |                     |
| CCDZ01012267 (WGS)    |                    |                     |
| CCDZ01021169 (WGS)    |                    |                     |
| AY635609 (nr/nt)      |                    |                     |
