# Supplementary material for: Comparative and Evolutionary Analyses of Meloidogyne spp. Based on Mitochondrial Genome Sequences
Source: PubMed Central journal article supplement (PMC4370701; doi:10.1371/journal.pone.0121142), 2015-03-23
Supplement: pone.0121142.s005.pdf [file pone.0121142.s005.pdf]

S2 Table. Taxonomic information and source of the *Meloidogyne* isolates included in this study.

| Species name          | Collection site                      | USDA Identification Code | GenBank accession number |
|-----------------------|--------------------------------------|--------------------------|--------------------------|
| <i>M. arenaria</i>    | unknown                              | 79H2                     | KM491199                 |
| <i>M. arenaria</i>    | unknown                              | 79H3                     | KM491200                 |
| <i>M. arenaria</i>    | unknown                              | 10C1                     | KM491201                 |
| <i>M. arenaria</i>    | Palm Mulrooney                       | 34B10                    | KM491202                 |
| <i>M. arenaria</i>    | unknown                              | 79H1                     | KM491203                 |
| <i>M. arenaria</i>    | Mendoza, Argentina                   | NA                       | KM491204                 |
| <i>M. chitwoodi</i>   | Tulelake, California (Isolate CAMC2) | NA                       | KJ476150                 |
| <i>M. enterolobii</i> | unknown                              | 80D5                     | KM491197                 |
| <i>M. enterolobii</i> | unknown                              | 80D4                     | KM491198                 |
| <i>M. floridensis</i> | Isolate 5                            | NA                       | CCDZ00000000             |
| <i>M. graminicola</i> | Batangas, Philippines                | NA                       | HG529223                 |
| <i>M. graminicola</i> | Hainan, China                        | NA                       | KJ139963                 |
| <i>M. hapla</i>       | Netherlands                          | 7J1                      | KM491205                 |
| <i>M. hapla</i>       | Switzerland                          | 6C1                      | KM491209                 |
| <i>M. hapla</i>       | Netherlands                          | 7J2                      | KM491210                 |
| <i>M. hapla</i>       | California (strain VW9)              | NA                       | ABLG01000000             |
| <i>M. incognita</i>   | Dominican Republic                   | 66E4                     | KM491191                 |
| <i>M. incognita</i>   | Dominican Republic                   | 66E2                     | KM491192                 |
| <i>M. incognita</i>   | Dominican Republic                   | 66E3                     | KM491193                 |
| <i>M. incognita</i>   | Nigeria                              | 59B4                     | KM491189                 |
| <i>M. incognita</i>   | Nigeria                              | 59B3                     | KM491194                 |
| <i>M. incognita</i>   | unknown                              | 79F1                     | KM491195                 |
| <i>M. incognita</i>   | unknown                              | 79F2                     | KM491188                 |
| <i>M. incognita</i>   | unknown                              | 79F3                     | KM491190                 |
| <i>M. incognita</i>   | Dominican Republic                   | 66E1                     | KM491196                 |
| <i>M. incognita</i>   | unknown                              | 79G2                     | KM491207                 |
| <i>M. incognita</i>   | unknown                              | 79g1                     | KM491206                 |
| <i>M. incognita</i>   | France (isolate NCM14)               | NA                       | KJ476151                 |
| <i>M. incognita</i>   | Mexico (isolate Morelos)             | NA                       | CABB01000000             |
| <i>M. naasi</i>       | Linn. Co. Oregon                     | 12A1                     | KM491211                 |
| <i>M. naasi</i>       | Linn. Co. Oregon                     | 12A2                     | KM491211                 |
| <i>M. naasi</i>       | Reading, FC                          | 55F8                     | KM491213                 |
| <i>M. naasi</i>       | Linn. Co. Oregon                     | 12A4                     | KM491216                 |
| <i>M. naasi</i>       | Linn. Co. Oregon                     | 12A3                     | KM491214                 |
| <i>M. naasi</i>       | Reading, FC                          | 55K9                     | KM491215                 |
| <i>M. naasi</i>       | unknown                              | 79G3                     | KM491208                 |
