# Supplementary material for: Comparative and Evolutionary Analyses of Meloidogyne spp. Based on Mitochondrial Genome Sequences
Source: PubMed Central journal article supplement (PMC4370701; doi:10.1371/journal.pone.0121142), 2015-03-23
Supplement: pone.0121142.s006.pdf [file pone.0121142.s006.pdf]

S3 Table. Mitochondrial genome organization of *M. hapla*, *M. floridensis* and *M. incognita*.

| Gene name       | Range of identity (%) within the genus <sup>a</sup> | <i>M. hapla</i>     |                                  |       | <i>M. floridensis</i> |                                  |       | <i>M. incognita</i> |                                  |       | Start/Stop codons |                     |                       |                          |                          |                            |                            |
|-----------------|-----------------------------------------------------|---------------------|----------------------------------|-------|-----------------------|----------------------------------|-------|---------------------|----------------------------------|-------|-------------------|---------------------|-----------------------|--------------------------|--------------------------|----------------------------|----------------------------|
|                 |                                                     | Gene length (in bp) | intergenic sequence <sup>b</sup> | %AT   | Gene length (in bp)   | intergenic sequence <sup>b</sup> | %AT   | Gene length (in bp) | intergenic sequence <sup>b</sup> | %AT   | <i>M. hapla</i>   | <i>M. incognita</i> | <i>M. floridensis</i> | <i>M. incognita</i> [15] | <i>M. chitwoodi</i> [15] | <i>M. graminicola</i> [14] | <i>M. graminicola</i> [15] |
| <i>cox1</i>     | 81-99                                               | 1551                | 21                               | 73.24 | 1557                  | -35                              | 76.62 | 1557                | -35                              | 76.62 | ATA/TAA           | TTA/TAA             | TTA/TAA               | TTA/T                    | ATT/TAG                  | ATT                        | ATA/TAA                    |
| <i>trnT</i>     | 82-100                                              | 54                  | -1                               |       | 55                    | -4                               |       | 55                  | -4                               |       |                   |                     |                       |                          |                          |                            |                            |
| <i>12S rRNA</i> | 78-99                                               | 616                 | -1                               | 80.36 | 614                   | 0                                | 81.92 | 614                 | 0                                | 81.76 |                   |                     |                       |                          |                          |                            |                            |
| <i>trnY</i>     | 81-100                                              | 54                  | 2                                |       | 53                    | 15                               |       | 53                  | 15                               |       |                   |                     |                       |                          |                          |                            |                            |
| <i>tRNA-W</i>   | 77-100                                              | 53                  | -3                               |       | 54                    | 48                               |       | 54                  | 48                               |       |                   |                     |                       |                          |                          |                            |                            |
| <i>nad1</i>     | 72-99                                               | 861                 | -2                               | 82.11 | 867                   | -15                              | 83.51 | 867                 | -15                              | 83.51 | TTG/TAG           | ATA/TAA             | ATA/TAA               | ATA/T                    | ATA/T                    | TTG/T                      | TTG/TAA                    |
| <i>trnL</i>     | 77-100                                              | 54                  | 12                               |       | 55                    | 0                                |       | 55                  | 0                                |       |                   |                     |                       |                          |                          |                            |                            |
| <i>nad2</i>     | 67-99                                               | nd                  | 63                               | 84.19 | 819                   | -15                              | 89.87 | 819                 | -15                              | 89.74 | ATT/ND            | ATT/TAA             | ATT/TAA               | ATT/T                    | ATT/TAA                  | ATT/TAA                    | ATA/TAA                    |
| <i>trnI</i>     | 78-100                                              | 55                  | 35                               |       | 54                    | 4                                |       | 54                  | 4                                |       |                   |                     |                       |                          |                          |                            |                            |
| <i>cox3</i>     | 75-100                                              | 733                 | -5                               | 80.51 | 762                   | -1                               | 83.46 | 762                 | -1                               | 83.46 | GTT/TAA           | ATA/TAA             | ATA/TAA               | ATA/TAA                  | ATT/T                    | TTG/TAA                    | TTG/TAA                    |
| <i>trnN</i>     | 78-100                                              | 55                  | -1                               |       | 56                    | 0                                |       | 56                  | 0                                |       |                   |                     |                       |                          |                          |                            |                            |
| <i>trnG</i>     | 85-100                                              | 53                  | -2                               |       | 54                    | -2                               |       | 54                  | -2                               |       |                   |                     |                       |                          |                          |                            |                            |
| <i>trnK</i>     | 83-100                                              | 55                  | -3                               |       | 54                    | -4                               |       | 54                  | -4                               |       |                   |                     |                       |                          |                          |                            |                            |
| <i>trnC</i>     | 85-100                                              | 51                  | -2                               |       | 53                    | -4                               |       | 53                  | -4                               |       |                   |                     |                       |                          |                          |                            |                            |
| <i>trnF</i>     | 87-100                                              | 54                  | 3                                |       | 54                    | -3                               |       | 54                  | -3                               |       |                   |                     |                       |                          |                          |                            |                            |
| <i>nad6</i>     | 68-100                                              | 390                 | 6                                | 88.72 | 399                   | 0                                | 92.98 | 398                 | 0                                | 92.35 | TTG/TAA           | TTA/TAA             | TTA/TAA               | TTA/TAA                  | TTA/TAG                  | ATT/TAG                    | ATT/TAG                    |
| <i>nad4L</i>    | 68-99                                               | 228                 | -29                              | 88.60 | 237                   | 1                                | 88.19 | 237                 | 1                                | 88.61 | ATA/TAA           | ATT/TAA             | ATT/TAA               | ATT/TAA                  | TTA/TAA                  | ATA/TAA                    | ATT/TAA                    |
| <i>cox2</i>     | 76-99                                               | 675                 | -2                               | 78.97 | 693                   | 535                              | 80.84 | 693                 | 1063                             | 81.10 | ATT/TAA           | TTA/TAG             | TTA/TAG               | TTA/TAG                  | ATT/T                    | ATT/TAA                    | ATT/TAA                    |
| <i>trn-H</i>    | 79-100                                              | 55                  | 0                                |       | 54                    | -2                               |       | 54                  | 0                                |       |                   |                     |                       |                          |                          |                            |                            |
| <i>16S rRNA</i> | 76-99                                               | 807                 | 6                                | 86.62 | 805                   | 0                                | 86.89 | 805                 | 0                                | 87.24 |                   |                     |                       |                          |                          |                            |                            |
| <i>nad3</i>     | 70-100                                              | 306                 | 16                               | 89.22 | 315                   | 17                               | 88.89 | 315                 | 17                               | 88.89 | ATT/TAG           | TTA/TAG             | TTA/TAG               | TTA/TAG                  | ATT/TAG                  | TTG/TAG                    | ATT/TAG                    |
| <i>cob</i>      | 76-99                                               | 1029                | 4                                | 80.56 | 1041                  | -15                              | 82.61 | 1041                | -15                              | 82.52 | ATG/TAA           | ATA/TAA             | ATA/TAA               | ATA/T                    | TTA/TAA                  | ATA/TAG                    | ATA/TAG                    |
| <i>trnL</i>     | 77-100                                              | 56                  | -3                               |       | 56                    | -3                               |       | 56                  | -3                               |       |                   |                     |                       |                          |                          |                            |                            |
| <i>trnP</i>     | 84-100                                              | 54                  | 18                               |       | 54                    | -3                               |       | 54                  | 122                              |       |                   |                     |                       |                          |                          |                            |                            |
| <i>nad4</i>     | 76-99                                               | 1005                | 144                              | 83.18 | 1173                  | 3                                | 84.74 | 1047                | 3                                | 83.86 | ATA/TAG           | ATA/TAA             | ATT/TAA               | ATT/TAA                  | ATT/TAA                  | ATA/TAG                    | ATA/TAG                    |
| <i>trnD</i>     | 80-100                                              | 55                  | > 4596                           |       | 54                    | >2774                            |       | 54                  | 4420-5910                        |       |                   |                     |                       |                          |                          |                            |                            |
| <i>trnM</i>     | 80-100                                              | 54                  | -1                               |       | 54                    | 3                                |       | 54                  | 3                                |       |                   |                     |                       |                          |                          |                            |                            |
| <i>trnS</i>     | 61-100                                              | 49                  | 290                              |       | 49                    | 7                                |       | 49                  | 7                                |       |                   |                     |                       |                          |                          |                            |                            |
| <i>atp6</i>     | 66-99                                               | 561                 | 6                                | 84.31 | 552                   | 3                                | 88.04 | 552                 | 3                                | 88.04 | ATG/TAG           | ATA/TAA             | ATA/TAA               | ATA/TAA                  | ATT/TAA                  | ATT/TAA                    | TTT/TAA                    |
| <i>nad5</i>     | 67-99                                               | 1500                | -15                              | 83.67 | 1503                  | -15                              | 84.96 | 1500                | -15                              | 84    | ATA/TAA           | TTA/TAA             | TTA/TAA               | TTA/T                    | TTA/TAA                  | ATA/TAA                    | ATA/TAA                    |
| <i>trnQ</i>     | 87-98                                               | 54                  | -3                               |       | 54                    | 0                                |       | 54                  | 0                                |       |                   |                     |                       |                          |                          |                            |                            |
| <i>trnA</i>     | 85-100                                              | 59                  | -8                               |       | 53                    | 0                                |       | 53                  | 0                                |       |                   |                     |                       |                          |                          |                            |                            |
| <i>trnR</i>     | 84-100                                              | 55                  | -5                               |       | 55                    | -12                              |       | 55                  | -12                              |       |                   |                     |                       |                          |                          |                            |                            |
| <i>trnV</i>     | 47-100                                              | 54                  | -3                               |       | 55                    | -4                               |       | 55                  | -4                               |       |                   |                     |                       |                          |                          |                            |                            |
| <i>trnE</i>     | 73-98                                               | 54                  | 0                                |       | 54                    | -1                               |       | 54                  | -1                               |       |                   |                     |                       |                          |                          |                            |                            |
| <i>trnS</i>     | 77-98                                               | 49                  | 74                               |       | 49                    | 19                               |       | 49                  | 19                               |       |                   |                     |                       |                          |                          |                            |                            |

<sup>a</sup>Range of identity (%) among *M. floridensis*, *M. hapla*, *M. incognita*, *M. chitwoodi* and *M. graminicola*.<sup>b</sup>Positive and negative values indicate gap nucleotides and overlapping nucleotides between two adjacent genes, respectively.
